# Supplementary material for: Differences in Genetic Variations Between Treatable and Recalcitrant Atopic Dermatitis in Korean
Source: PubMed Central journal article supplement — Allergy Asthma Immunol Res. 2018 Apr 3;10(3):244–52. doi: 10.4168/aair.2018.10.3.244 (PMC5911443; doi:10.4168/aair.2018.10.3.244), 2018-04-03
Supplement: aair-10-244-s001.pdf [file aair-10-244-s001.pdf]

**Supplemental Table.** The genetic variation in skin barrier- and immune response-related genes in subjects with atopic dermatitis and controls

| Gene name                | Atopic dermatitis |                           |                         | Control       |                           |                         |
|--------------------------|-------------------|---------------------------|-------------------------|---------------|---------------------------|-------------------------|
|                          | Wild type (%)     | Heterozygous mutation (%) | Homozygous mutation (%) | Wild type (%) | Heterozygous mutation (%) | Homozygous mutation (%) |
| <i>FLG</i> 3321delA*     | 96.42             | 3.58                      | 0                       | 99.55         | 0.45                      | 0                       |
| <i>FLG</i> K4022X        | 96.42             | 3.58                      | 0                       | 96.88         | 3.13                      | 0                       |
| <i>KLK7</i> *            | 31.90             | 52.33                     | 15.77                   | 31.70         | 59.82                     | 8.48                    |
| <i>SPINK1</i> 1188       | 31.90             | 43.73                     | 24.37                   | 30.80         | 52.68                     | 16.52                   |
| <i>SPINK2</i> 475*       | 45.88             | 24.73                     | 29.39                   | 44.64         | 37.50                     | 17.86                   |
| <i>DEFB1</i> rs5743399   | 35.48             | 63.44                     | 1.08                    | 41.96         | 58.04                     | 0                       |
| <i>DEFB1</i> rs1800629*  | 10.75             | 69.53                     | 19.71                   | 22.32         | 61.16                     | 16.52                   |
| <i>KDR</i> rs2251746*    | 73.12             | 26.88                     | 0                       | 81.25         | 18.75                     | 0                       |
| <i>IL5RA</i> rs31563*    | 21.15             | 78.85                     | 0                       | 55.36         | 44.64                     | 0                       |
| <i>IL9</i> rs3093467*    | 67.03             | 31.18                     | 1.79                    | 80.36         | 17.86                     | 1.79                    |
| <i>IL12RB1</i> rs436857* | 51.25             | 48.75                     | 0                       | 61.61         | 38.39                     | 0                       |
| <i>IL12RB1</i> rs20541*  | 53.76             | 43.37                     | 2.87                    | 66.96         | 30.80                     | 2.23                    |

Adapted with permission from Yoon *et al.*<sup>13</sup>

\*statistically significant difference found between the 2 groups.
